# Supplementary material for: Targeting the splicing factor NONO inhibits GBM progression through GPX1 intron retention
Source: PubMed Central journal article supplement (PMC9330516; doi:10.7150/thno.72248), 2022-07-11
Supplement: thnov12p5451s1.pdf [file thnov12p5451s1.pdf]

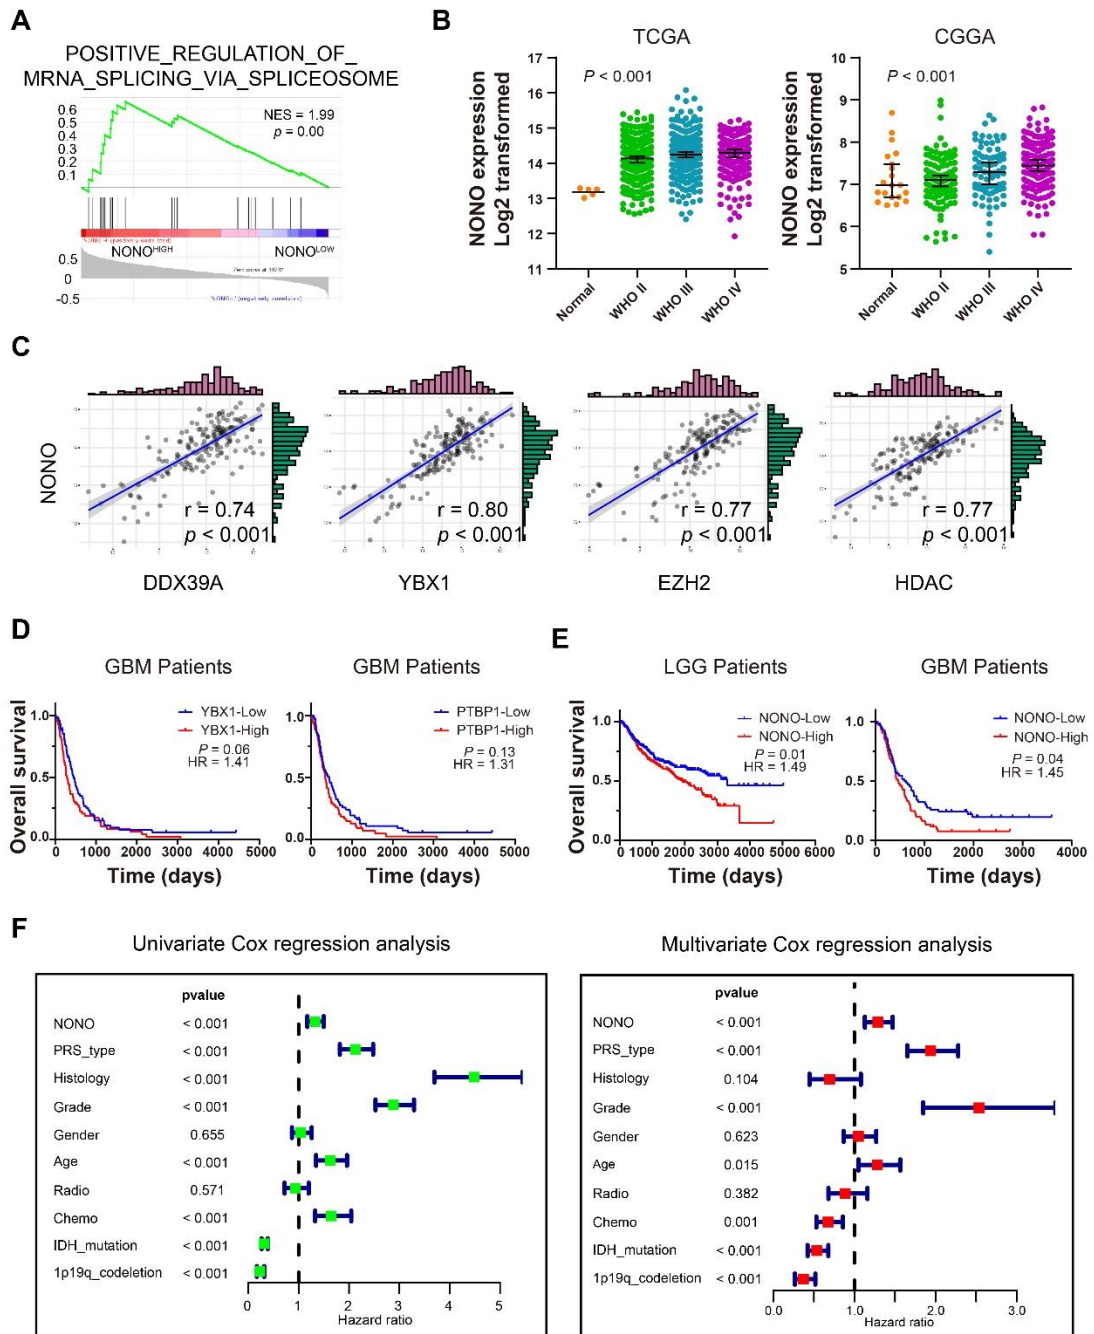

**Figure S1. NONO is an upregulated mRNA splicing factor in glioma and is correlated with poor prognosis.**

**A** GSEA enrichment showing the positive association of NONO-high coregulated genes with mRNA-Splicing-Via-Spliceosome gene signatures. The expression data was obtained from the CGGA. NES = normalized enrichment score. **B** NONO expression analysis in

non-neoplastic brain tissue and glioma based on TCGA (n = 675) and CGGA (n = 345) datasets. **C** The positive correlation between *DDX39A*, *YBX1*, *EZH2*, *HDAC* and *NONO* based on the CGGA GBM dataset (n = 174). **D** Kaplan–Meier analysis for patient OS based on *YBX1* and *PTBP1* expression in GBM from the CGGA dataset (n = 138). **E** Kaplan–Meier analysis for patient OS based on *NONO*-high versus *NONO*-low expression in LGG (n = 404) and GBM (n = 138). Data were obtained from the CGGA dataset and *P*-values were obtained from the log-rank test. **F** Univariate and multivariate Cox regression of *NONO* expression for overall survival in CGGA glioma patients.

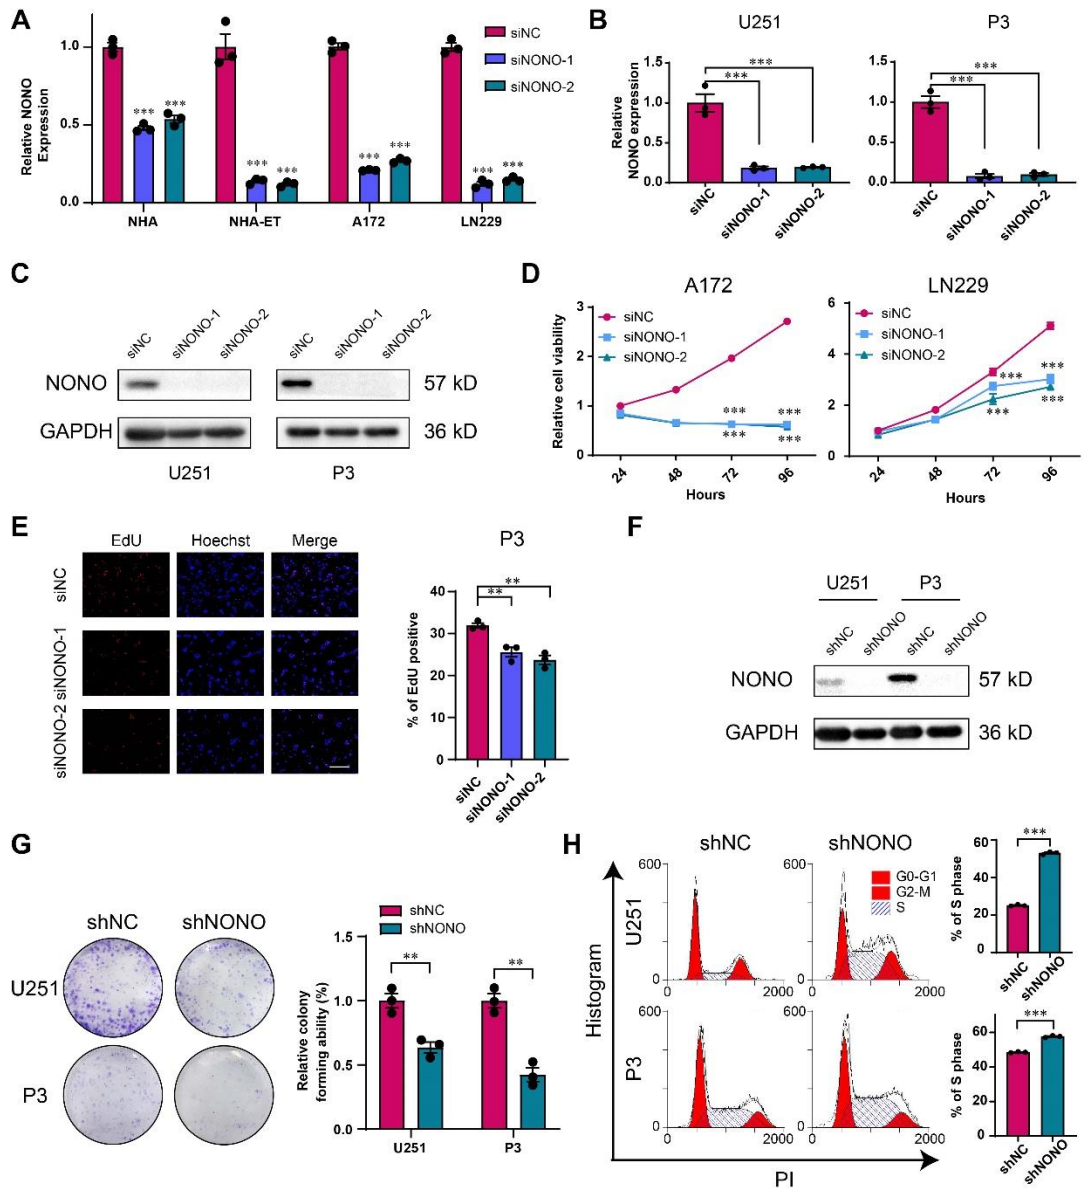

**Figure S2. Knockdown of NONO suppresses cell growth in GBM.**

**A** qRT-PCR analysis of *NONO* expression in NHA, NHA-ET and GBM cell lines transfected with siNC, siNONO-1 and siNONO-2 (n = 3). *GAPDH* was used for normalization. **B** Relative expression levels of *NONO* in U251 and P3 transfected with siNC, siNONO-1 and siNONO-2 (n = 3). *GAPDH* was used for normalization. **C** Western blot to detect *NONO* expression in U251 and P3 transfected with siNC, siNONO-1 and siNONO-2 (n = 3). **D** CCK-8 assay for cell viability of A172 and LN229 transfected with siNC, siNONO-1 and

siNONO-2 (n = 3). Obtained data were normalized with the siNC group. **E** EdU assay to assess the cell proliferation of P3 transfected with siNC, siNONO-1 and siNONO-2 (n = 3). Scale bar = 100  $\mu$ m. **F** Western blot to detect NONO expression in U251- and P3-shNC or -shNONO (n = 3). **G** Colony forming assay for U251- and P3-shNC or -shNONO (n = 3). **H** Flow cytometry for cell cycle analysis of PI stained U251- and P3-shNC or -shNONO (n = 3). Data are shown as mean  $\pm$  SEM. \* $P$  < 0.05, \*\* $P$  < 0.01, \*\*\* $P$  < 0.001.

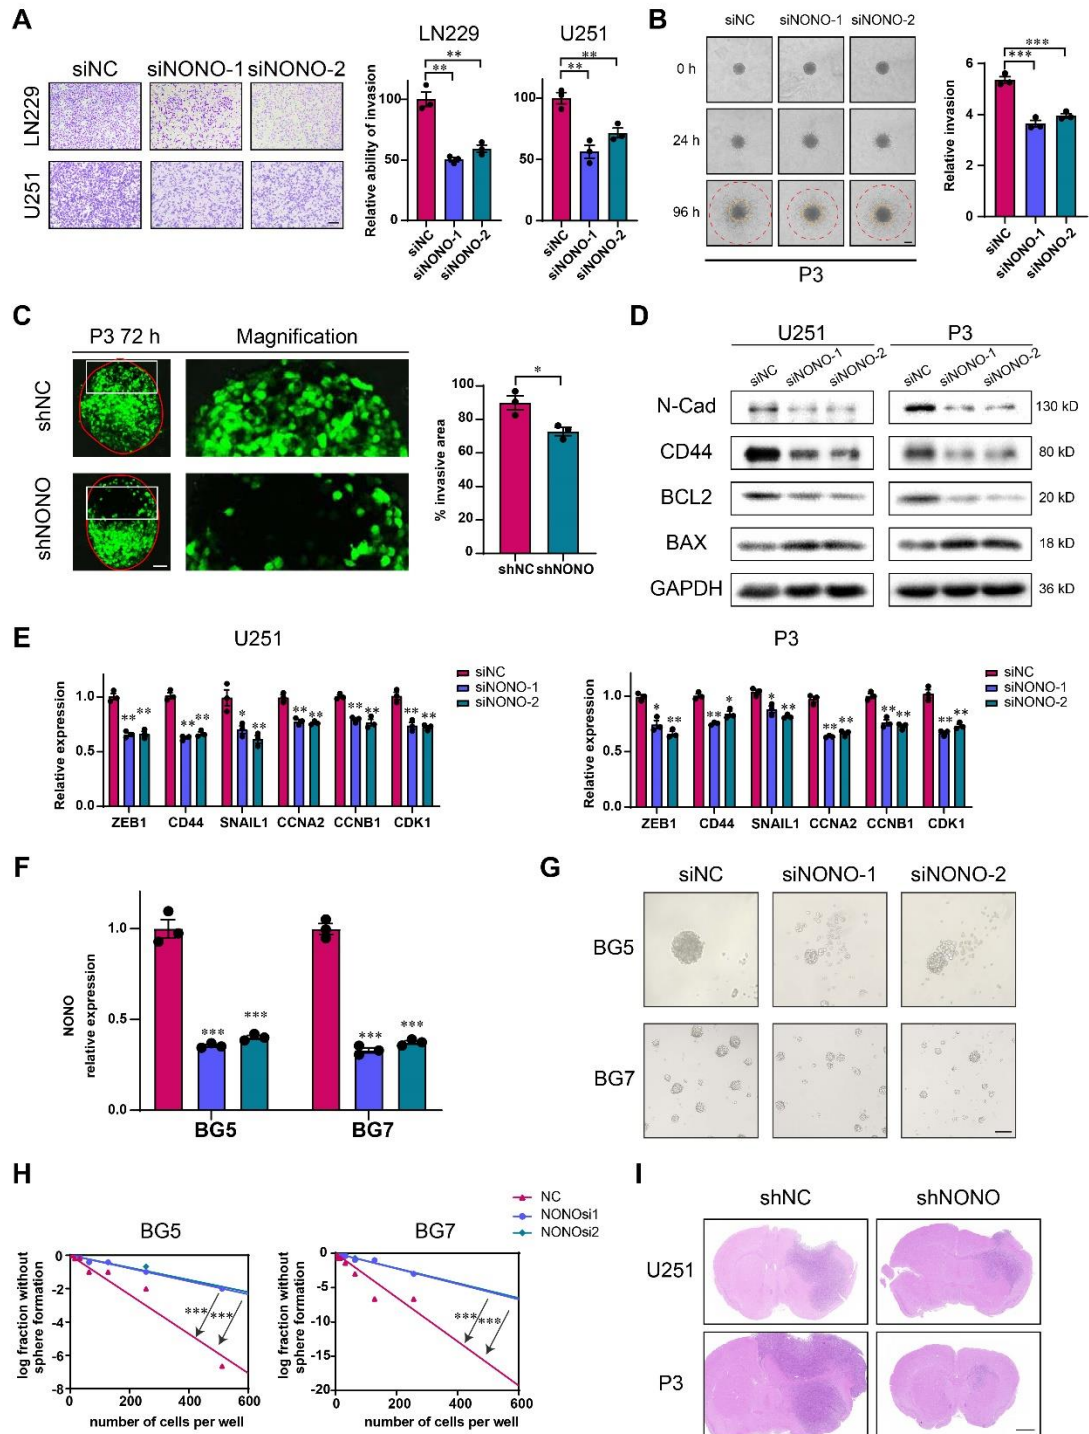

**Figure S3. NONO knockdown inhibits invasion, sphere-forming ability and in vivo growth of GBM.**

**A** Transwell assay of LN229 and U251 transfected with siNC, siNONO-1 and siNONO-2 (n = 3). Scale bar = 100  $\mu$ m. **B** 3D tumor spheroid invasion assay to measure invasion of P3

transfected with siNC, siNONO-1 and siNONO-2 (n = 3). Scale bar = 200  $\mu$ m. **C** Ex vivo co-culture invasion assays for P3-shNC or -shNONO (n = 3). The invasion ability was evaluated at 72 h. Scale bar = 200  $\mu$ m. **D** Western blot to detect expression of N-cad, CD44, BCL-2 and BAX in U251 and P3 transfected with siNC, siNONO-1 and siNONO-2 (n = 3). **E** qRT-PCR analysis of expression of EMT related and cell cycle related genes in U251 and P3 transfected with siNC, siNONO-1 and siNONO-2 (n = 3). *GAPDH* was used for normalization. **F** The knockdown efficiency of NONO in GSCs BG5 and BG7 transfected with siNC, siNONO-1 and siNONO-2 (n = 3). **G** Representative images of tumorsphere formation assays for BG5 and BG7 transfected with siNC, siNONO-1 and siNONO-2 (n = 3). Scale bar = 100  $\mu$ m. **H** Extreme limiting dilution assay performed for GSCs BG5 and BG7 transfected with siNC, siNONO-1 and siNONO-2 (n = 3). **I** Representative images of HE staining of mouse brains implanted with U251- or P3-shNC or -shNONO. Scale bar = 1 mm. Data are shown as mean  $\pm$  SEM. \**P* < 0.05, \*\**P* < 0.01, \*\*\**P* < 0.001.

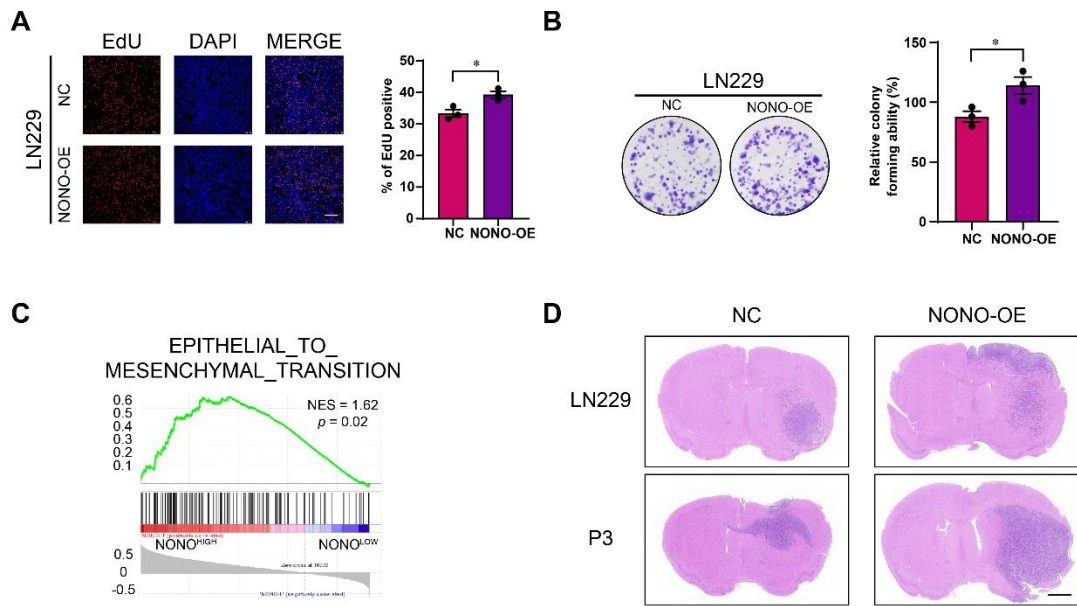

**Figure S4. Overexpression of NONO promotes GBM proliferation in vitro and in vivo.**

**A** EdU assay to assess the cell growth of LN229-NONO-OE or -NC (n = 3). Scale bar = 100  $\mu$ m. **B** Colony forming assay for LN229-NONO-OE or -NC (n = 3). **C** GSEA enrichment showing the positive association of *NONO*-high coregulated genes with epithelial to mesenchymal transition gene signatures. The expression data was obtained from the CGGA. **D** Representative images of HE staining of mouse brains implanted with LN229- and P3-NONO-OE or -NC. Scale bar = 1 mm. Data are shown as mean  $\pm$  SEM. \**P* < 0.05.

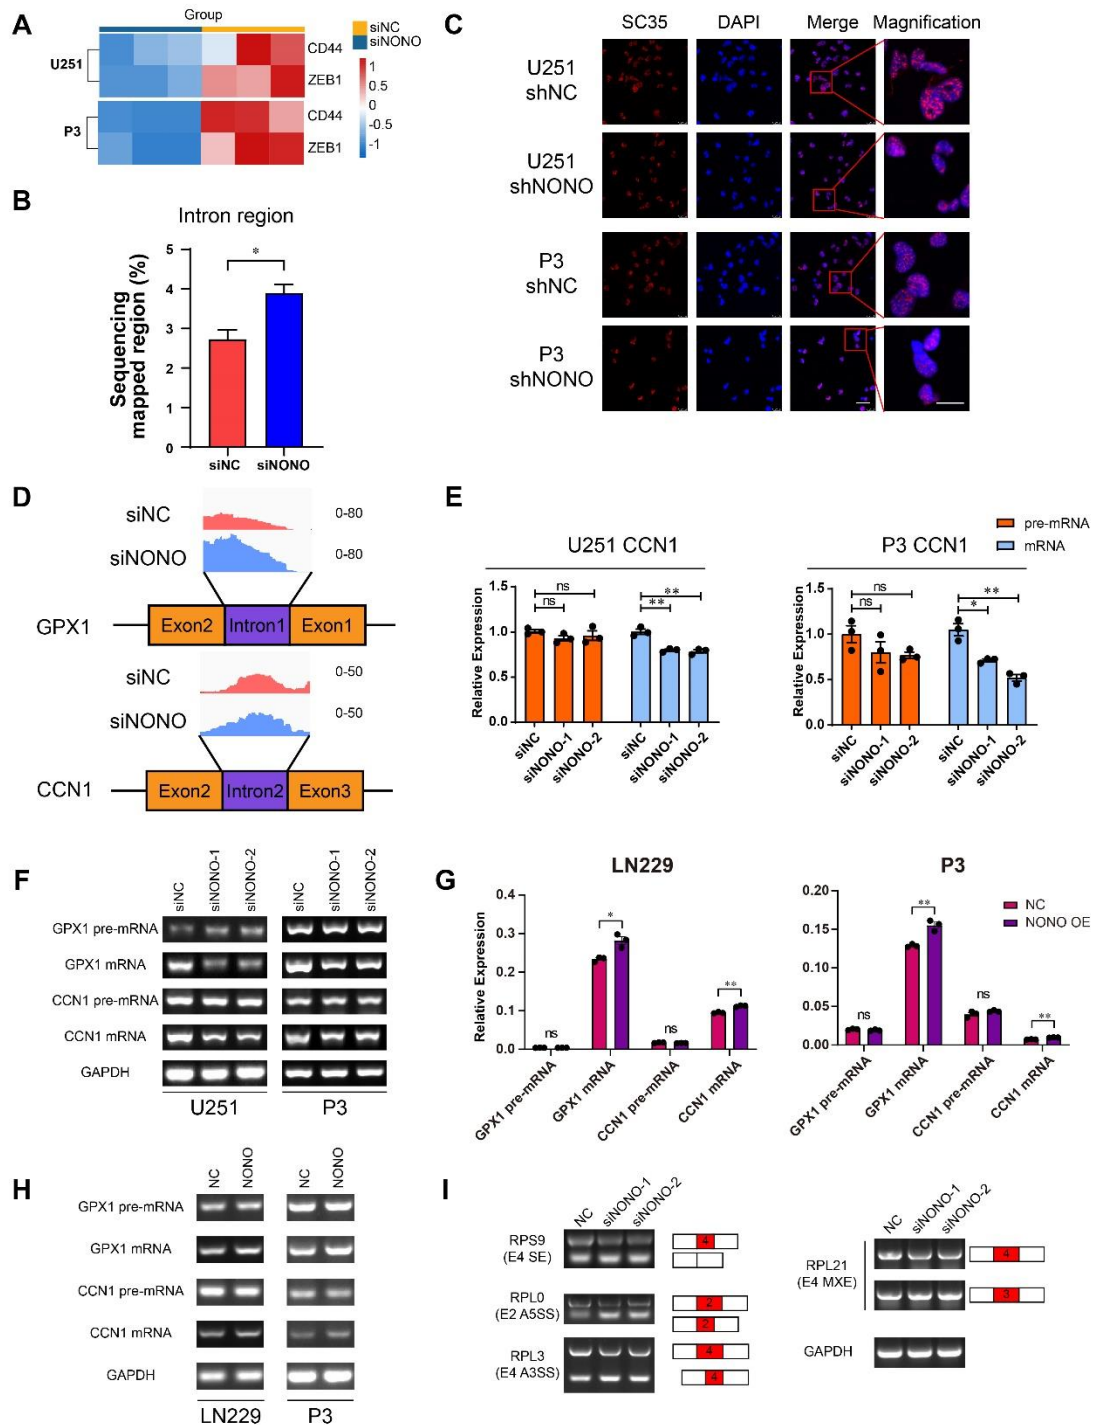

**Figure S5. Expression of *GPX1* and *CCN1* is regulated by NONO-mediated pre-mRNA splicing.**

**A** Heatmap displaying *CD44* and *ZEB1* expression obtained from RNA sequencing for U251 and P3 transfected with siNC and siNONO. **B** The percentage of reads of mRNA-



seq mapping to introns in the genome (n = 3). **C** Immunofluorescence images for SC35 (red) and nuclear (blue) staining for U251- and P3-shNC or -shNONO (n = 3). Scale bar = 50  $\mu\text{m}$  and 25  $\mu\text{m}$  (magnified inset). **D** The comparison of siNC and siNONO sequencing peaks in introns from U251. **E** qRT-PCR analysis of *GPX1* and *CCN1* mRNA expression in U251 and P3 transfected with siNC, siNONO-1 and siNONO-2 (n = 3). *GAPDH* was used for normalization. **F** Semi-quantitative PCR of pre-mRNA and mRNA for *GPX1* and *CCN1* in U251 and P3 transfected with siNC, siNONO-1 and siNONO-2 (n = 3). **G** qRT-PCR analysis of pre-mRNA and mRNA for *GPX1* and *CCN1* in LN229- and P3-NONO-OE or NC (n = 3). *GAPDH* was used for normalization. **H** Semi-quantitative PCR analysis of *GPX1* and *CCN1* pre-mRNA and mRNA in LN229- and P3-NONO-OE or NC (n = 3). *GAPDH* was used as a control. **I** Semi-quantitative PCR analysis for NONO-regulated AS events in 4 other representative genes in U251 cells (n = 3). *GAPDH* was used as a control. Data are shown as mean  $\pm$  SEM. \**P* < 0.05, \*\**P* < 0.01, \*\*\**P* < 0.001.

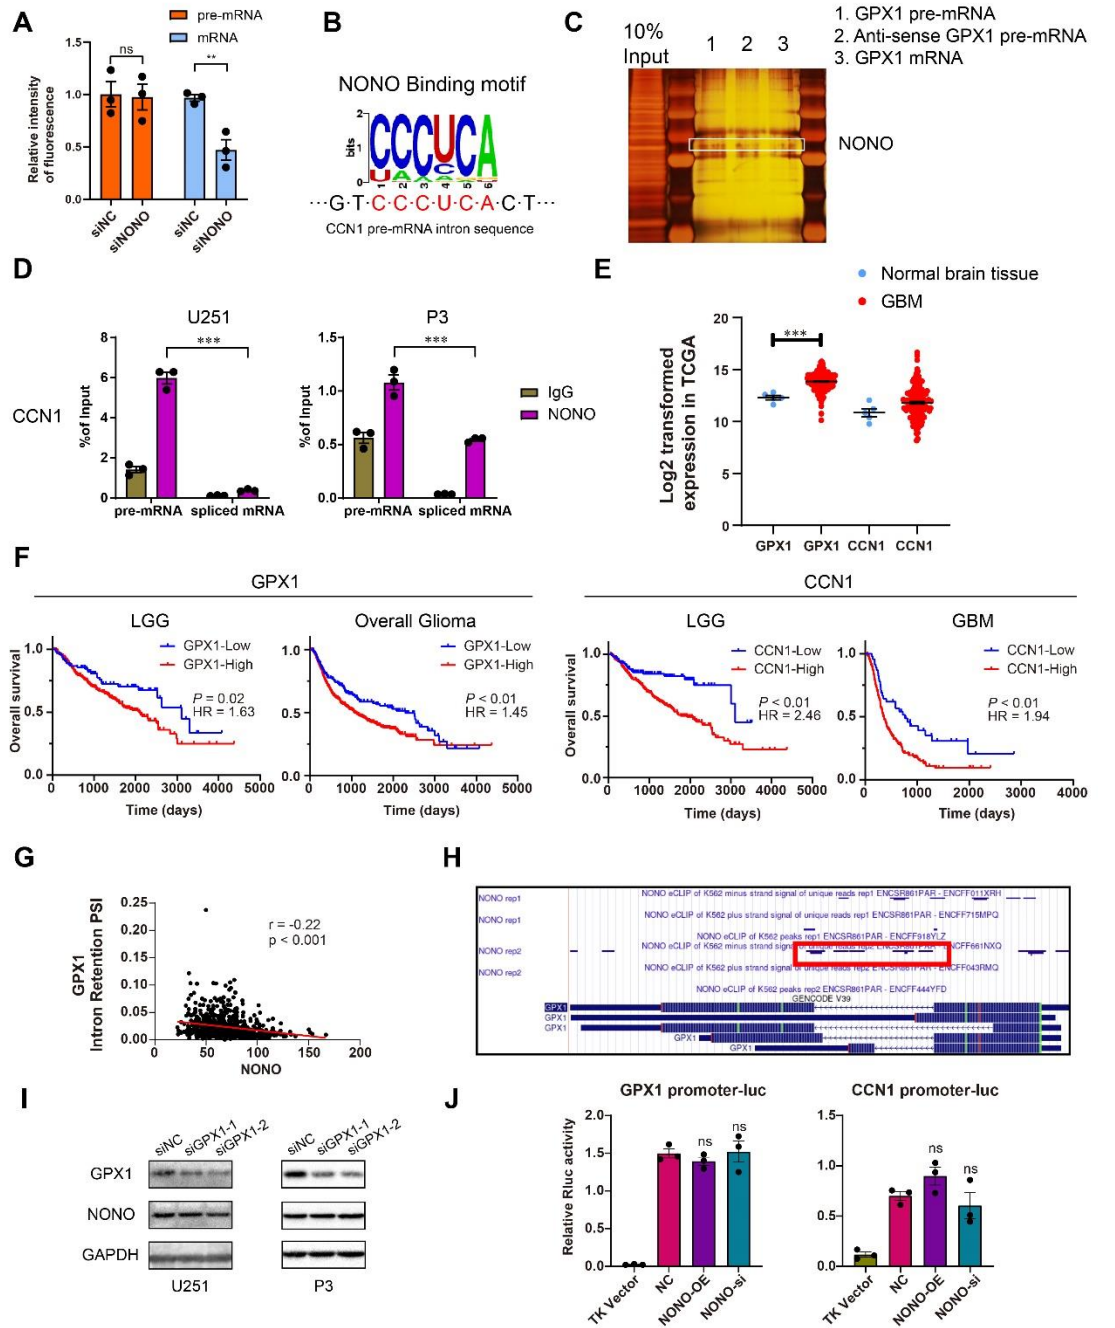

**Figure S6. NONO binds the pre-mRNA of *GPX1* and *CCN1*, and *GPX1* is significantly upregulated in GBM.**

**A** Quantification of FISH staining of *GPX1* pre-mRNA and mRNA in U251 cells (n = 3). **B** The NONO binding motif in the intron of the *CCN1* pre-mRNA. **C** Silver staining of SDS-PAGE to detect protein associated with RNA from a pull-down assay using *GPX1* pre-mRNA, mRNA and anti-sense pre-mRNA sequences (n = 3). **D** RIP-PCR assay for detection of

*CCN1* pre-mRNA and mRNA binding with NONO (n = 3). Input was used for normalization and IgG was used for the negative control. **E** Log<sub>2</sub> transformed expression data for *GPX1* and *CCN1* in GBM and non-neoplastic brain tissue samples from the TCGA database (Normal n = 5, GBM n = 169). **F** Kaplan–Meier analysis of patient OS based on *GPX1*-high versus *GPX1*-low expression in LGG (n = 409) and overall glioma (n = 624), and *CCN1*-high versus *CCN1*-low expression in LGG (n = 409) and GBM (n = 215). Data were obtained from the CGGA dataset and *P*-values were obtained from the log-rank test. **G** The correlation between *GPX1* PSI of intron retention and *NONO* expression in the TCGA dataset (n = 663). **H** The eCLIP project from ENCODE project ENCSR861PAR for NONO binding to *GPX1*. **I** Western blot to detect expression of NONO in U251 and P3 transfected with siNC, siGPX1-1 and siGPX1-2 (n = 3). **J** Luciferase activity detected for *GPX1* and *CCN1* promoter-dual-luciferase reporter gene assay constructs co-transfected into U251 cells with the NONO-OE construct or siNONO (n = 3). Data are shown as mean ± SEM.

\*\*\**P* < 0.001.

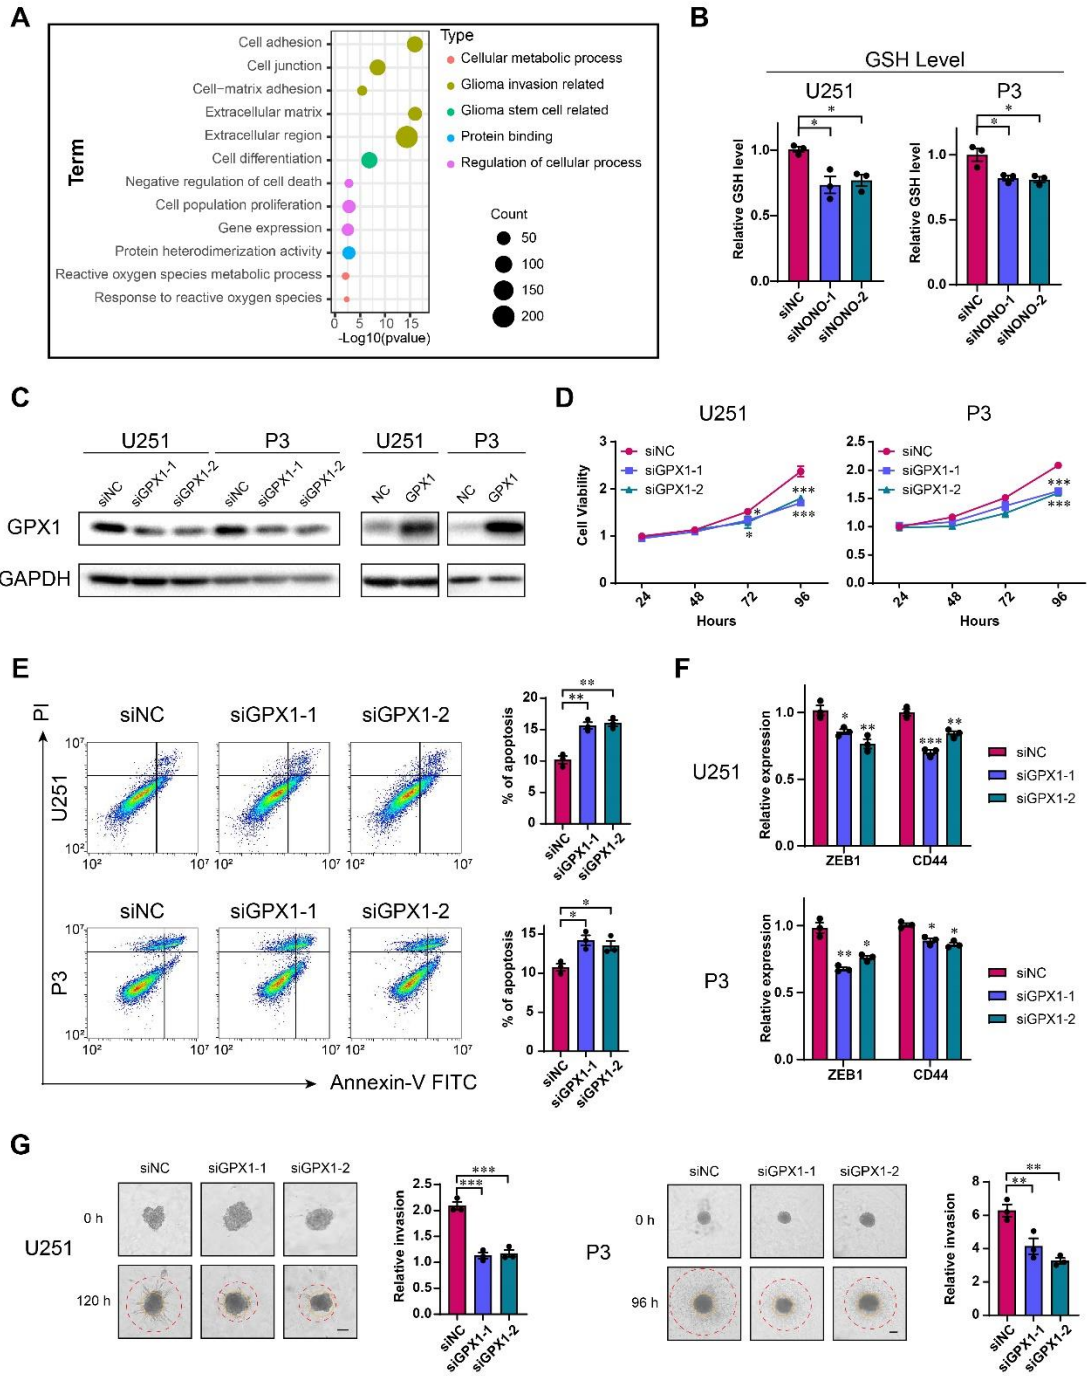

**Figure S7. NONO inhibition impairs redox homeostasis and knockdown of GPX1 suppresses glioma proliferation and promotes apoptosis.**

**A** GO enrichment of RNA-seq of U251 based on siNONO versus siNC. **B** Total glutathione assay for U251 and P3 transfected with siNC, siNONO-1 and siNONO-2 ( $n = 3$ ). Total GSH levels for siNC were used for normalization. **C** Western blot analysis for siRNA knockdown

of GPX1 siNC, siGPX1-1 and siGPX1-2 and overexpression efficiency of plasmid expressing NC or GPX1 in U251 and P3 (n = 3). **D** CCK-8 assay for cell viability of U251 and P3 transfected with siNC, siGPX1-1 and siGPX1-2. Obtained data were normalized with the siNC group (n = 3). **E** Flow cytometry to detect Annexin V-FITC and PI staining to assess apoptosis in U251 and P3 transfected with siNC, siGPX1-1 and siGPX1-2 (n = 3). **F** qRT-PCR analysis of mRNA for EMT related genes *ZEB1* and *CD44* in U251 and P3 transfected with siNC, siGPX1-1 and siGPX1-2 (n = 3). *GAPDH* was used for normalization. **G** 3D tumor spheroid invasion assay for U251 and P3 transfected with siNC, siGPX1-1 and siGPX1-2 (n = 3). Scale bar = 200  $\mu$ m. Data are shown as mean  $\pm$  SEM. \**P* < 0.05, \*\**P* < 0.01, \*\*\**P* < 0.001.

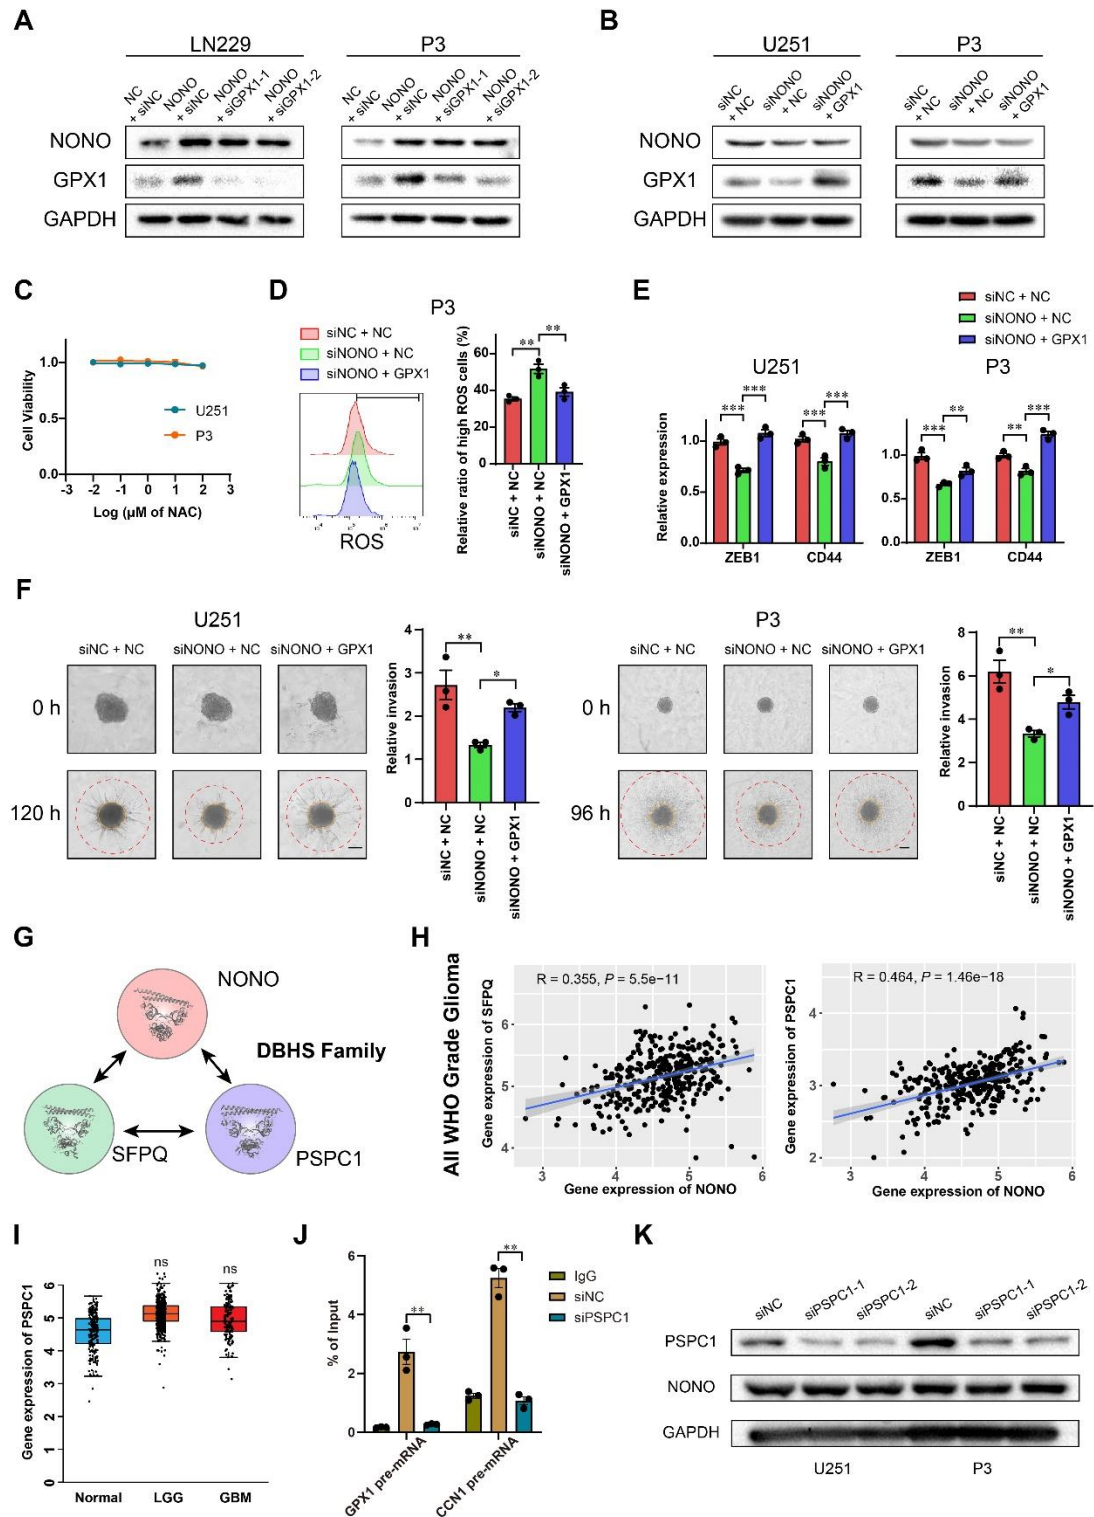

**Figure S8. GPX1 rescues the knockdown of NONO and NONO is more highly correlated with PSPC1.**

**A** Western blot analysis for GPX1 rescue in LN229 and P3 transfected with siNC, siGPX1-

1 or siGPX1-2 and plasmid expressing NC or NONO (n = 3). **B** Western blot analysis for GPX1 rescue in U251 and P3 transfected with plasmid expressing NC or NONO and siNC or siNONO (n = 3). **C** CCK-8 assay for cell viability of U251 and P3 after treatment with the H<sub>2</sub>O<sub>2</sub> inhibitor NAC (n = 3). Obtained data were normalized with the 0.01 μM group. **D** Flow cytometric detection of ROS in P3 transfected with plasmid expressing NC or GPX1, and siNC or siNONO (n = 3). The bar graph shows the ratio of cells with ROS levels higher than the given threshold. **E** qRT-PCR analysis of mRNA for EMT related genes *ZEB1* and *CD44* in U251 and P3 transfected with plasmid expressing NC or GPX1 and siNC or siNONO (n = 3). *GAPDH* was used for normalization. **F** 3D tumor spheroid invasion assay for U251 and P3 transfected with plasmid expressing NC or GPX1 and siNC or siNONO (n = 3). Scale bar = 200 μm. **G** The relationship between proteins of the DBHS family. **H** Correlation of gene expression for *NONO* and *SFPQ* and *NONO* and *PSPC1* in gliomas from the CGGA (n = 325). **I** The expression levels of *PSPC1* in normal tissue (n = 207), LGG (n = 518) and GBM (n = 162) in TCGA and GTEx datasets. **J** The RIP-PCR assay with NONO to detect *GPX1* and *CCN1* pre-mRNA (n = 3). Input was used for normalization and IgG was used for the negative control. **K** Western blot to detect expression of NONO in U251 and P3 transfected with siNC, siPSPC-1 and siPSPC1-2 (n = 3). Data are shown as mean ± SEM. \**P* < 0.05, \*\**P* < 0.01, \*\*\**P* < 0.001.

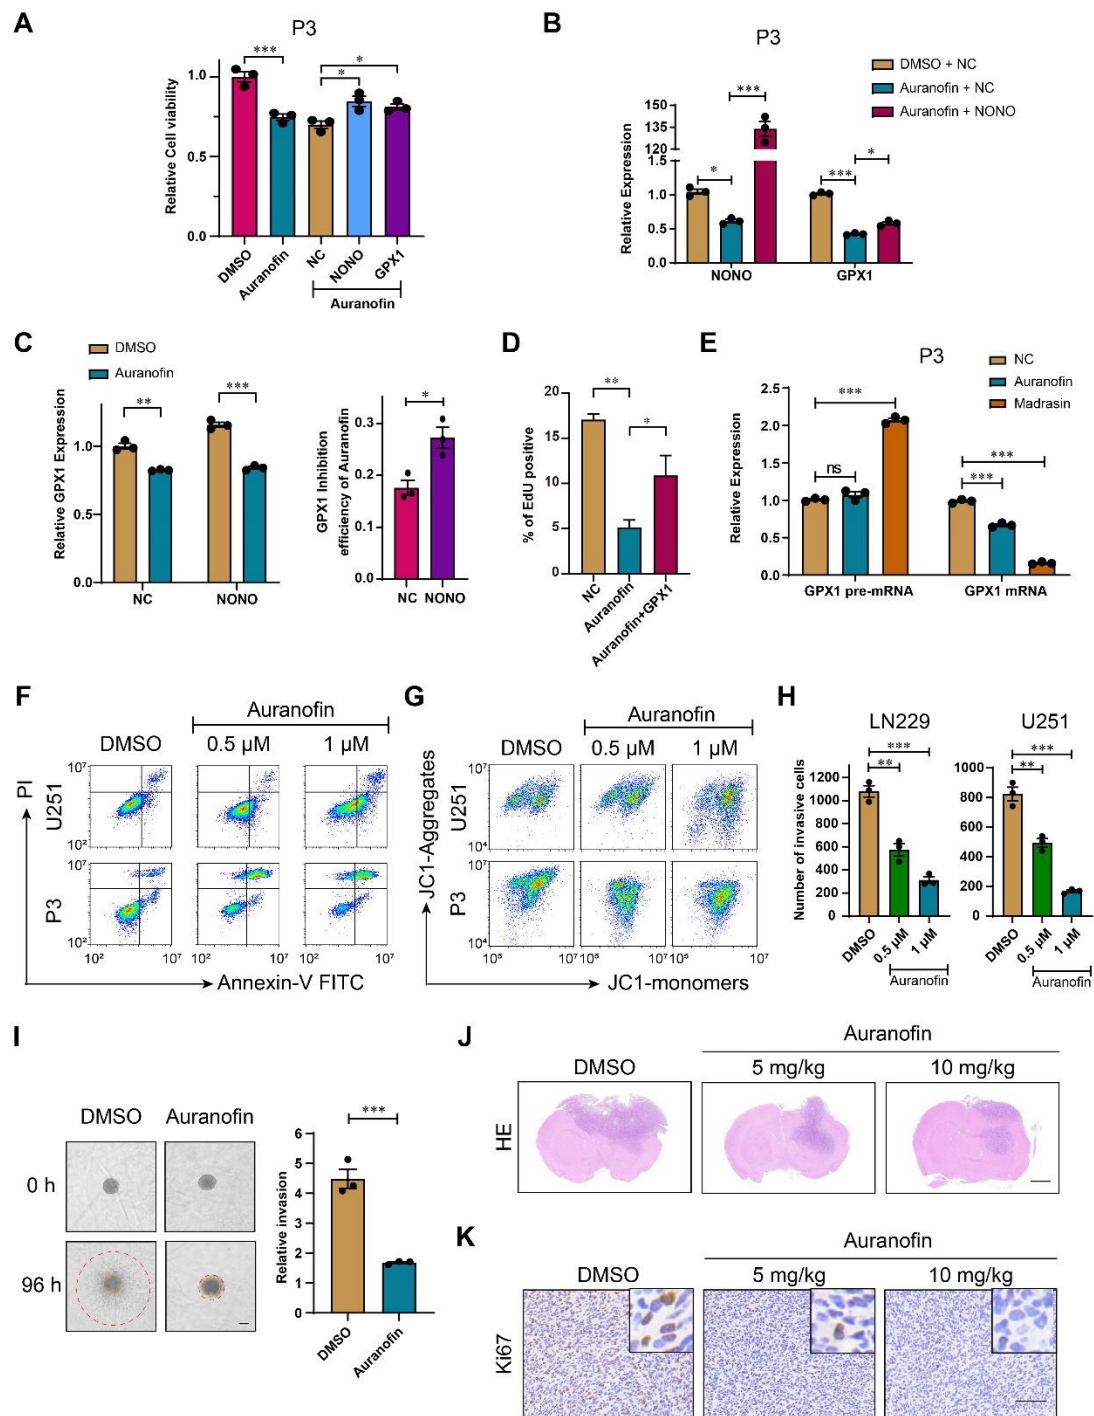

**Figure S9. Auranofin inhibits NONO-mediated splicing, invasion and growth of glioma.**

**A** CCK-8 assay for relative cell viability for Auranofin rescue experiments in P3 as determined at 48 h. Cell viability of the DMSO group was used for normalization (n = 3). **B**



qRT-PCR analysis of *NONO* and *GPX1* in P3 expressing NC or *NONO* and treated with 1  $\mu$ M Auranofin (n = 3). *GAPDH* was used for normalization. **C** The expression of *GPX1* in parental U251 and U251-*NONO*-OE and treated with 1  $\mu$ M Auranofin (n = 3). Relative inhibition efficiency of 1  $\mu$ M Auranofin on *GPX1* mRNA in U251-NC and -*NONO* cells. **D** Statistical results for EdU assays for U251 cells after treatment with Auranofin or Auranofin and transfection with *GPX1* cDNA (n = 3). **E** qRT-PCR analysis of *GPX1* pre-mRNA and mRNA in P3 treated with DMSO, 1  $\mu$ M Auranofin or 30  $\mu$ M Madrasin (n = 3). *GAPDH* was used for normalization. **F** Flow cytometry to detect Annexin V-FITC and PI staining to assess apoptosis in U251 and P3 treated with DMSO, 0.5  $\mu$ M or 1  $\mu$ M Auranofin (n = 3). **G** Flow cytometry to detect JC-1 staining of U251 and P3 treated with DMSO, 0.5  $\mu$ M or 1  $\mu$ M Auranofin (n = 3). FL2 corresponds to oxidized JC1 (JC1-Aggregate) and FL1 corresponds to non-oxidized JC1 (JC1 Monomers). **H** Transwell assays for LN229 and U251 treated with DMSO, 0.5  $\mu$ M or 1  $\mu$ M Auranofin (n = 3). **I** 3D tumor spheroid invasion assay of P3 treated with DMSO or 1  $\mu$ M Auranofin (n = 3). Scale bar = 200  $\mu$ m. **J** Representative images of HE staining of mouse brains from animals implanted with P3 and treated with DMSO, 5 mg/kg Auranofin, or 10 mg/kg Auranofin. Scale bar = 1 mm. **K** IHC to detect levels of the proliferation marker Ki67 in GBM xenografts. Scale bar = 100  $\mu$ m. Data are shown as mean  $\pm$  SEM. \**P* < 0.05, \*\**P* < 0.01, \*\*\**P* < 0.001.

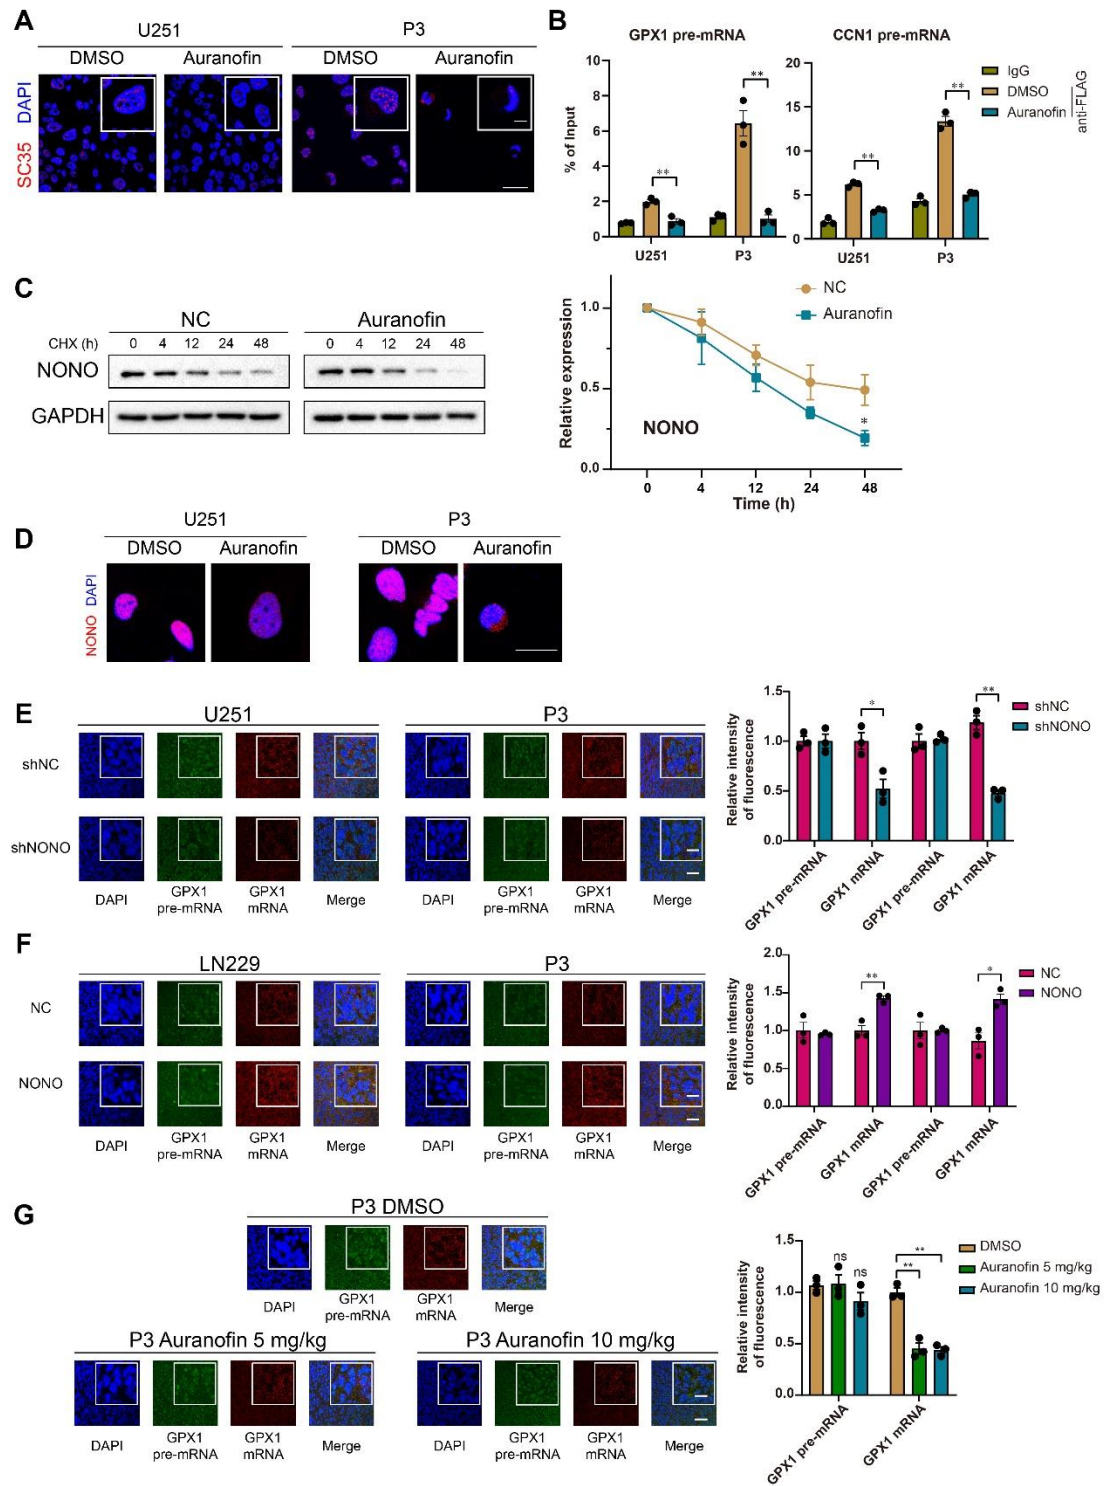

**Figure S10. Auranofin impairs NONO stability and RNA binding, and inhibits NONO-mediated splicing in vivo.**

**A** Immunofluorescence images for SC35 (red) and nuclear (blue) staining for U251 and P3 treated with DMSO or Auranofin (n = 3). Scale bar = 50  $\mu$ m and 25  $\mu$ m (magnified inset).

**B** RIP-PCR assay for detection of *GPX1* and *CCN1* pre-mRNA binding with NONO (n = 3). Input was used for normalization and IgG was used for the negative control. **C** Western blot to detect degradation of NONO in U251 treated with DMSO or Auranofin in CHX assay (n = 3). **D** Immunofluorescence staining showing subcellular localization of NONO (red) (n = 3). Nuclei are stained with DAPI (blue). Scale bar = 25  $\mu\text{m}$ . **E-F** Fluorescence images for RNA FISH performed with probes for *GPX1* pre-mRNA or mRNA for detection in U251-, P3-, and LN229-shNONO or NONO-OE xenografts (n = 3). Scale bar = 50  $\mu\text{m}$  and 10  $\mu\text{m}$  (in magnification view). **G** Fluorescence images for RNA FISH performed with probes for *GPX1* pre-mRNA or mRNA for detection in P3-shNONO or NONO-OE xenografts treated with DMSO, 5 mg/kg or 10 mg/kg Auranofin (n = 3). Scale bar = 50  $\mu\text{m}$  and 10  $\mu\text{m}$  (magnified inset). Data are shown as mean  $\pm$  SEM. \* $P < 0.05$ , \*\* $P < 0.01$ .

**Table S1. The primer sequences used in the research**

| Gene symbol                               | Primer  | Sequence                |
|-------------------------------------------|---------|-------------------------|
| NONO                                      | Forward | AACCTTCCCTGATGCGAGAG    |
|                                           | Reverse | TTCAGTTGTTGGTGGGGTCA    |
| GAPDH                                     | Forward | GCACCGTCAAGGCTGAGAAC    |
|                                           | Reverse | TGGTGAAGACGCCAGTGGGA    |
| CCNA2                                     | Forward | AGCACTCTACACAGTCACGG    |
|                                           | Reverse | TGCTGTGGTGCTTTGAGGTA    |
| CCNB1                                     | Forward | GGCGAAGATCAACATGGCAG    |
|                                           | Reverse | TTTGCTTCCTTCTTCATAGGCA  |
| CDK1                                      | Forward | AGAAAGTGAAGAGGAAGGGGT   |
|                                           | Reverse | TAAGCACATCCTGAAGACTGACT |
| ZEB1                                      | Forward | AATTCACAGTGGAGAGAAGCCA  |
|                                           | Reverse | GGTCGCCCATTCACAGGTAT    |
| CD44                                      | Forward | CGTGGAGAAAAATGGTCGCT    |
|                                           | Reverse | TGTGGGCAAGGTGCTATTGAA   |
| SNAIL                                     | Forward | CGGAAGCCTAACTACAGCGA    |
|                                           | Reverse | GCCAGGACAGAGTCCCAGAT    |
| GPX1 pre-mRNA                             | Forward | AGGGCAAAATCCCGGTGAC     |
|                                           | Reverse | GAGCTTGGGGTTCGGTCATAA   |
| GPX1 mRNA                                 | Forward | GTGCAACCAGTTTGGGCATC    |
|                                           | Reverse | GCCCACCAGGAATTCTCAA     |
| CCN1 pre-mRNA                             | Forward | AAGATGCTTGTGGTTTGGCCC   |
|                                           | Reverse | TTCCGTATGCGCTTTCGTTG    |
| CCN1 mRNA                                 | Forward | CAAGGGGCTGGAATGCAACT    |
|                                           | Reverse | TTCTCGTCAACTCCACCTCG    |
| RPS9                                      | Forward | CCGGAACAAACGTGAGGTCT    |
|                                           | Reverse | AAGGACGGGATGTTCACCAC    |
| RPLP0                                     | Forward | TTCTCTCGCCAGGCGTCC      |
|                                           | Reverse | AGCTGGGTTGTTTTCCAGGT    |
| RPL3                                      | Forward | ACCATTGTAAGACACCACCC    |
|                                           | Reverse | TCCTGCCCAAACACTTGGTTC   |
| RPL21 (include 4 <sup>th</sup><br>intron) | Forward | AGGGAAAGAGGAGAGGCACC    |
|                                           | Reverse | GTTTACAACAATGCCAACAGCA  |
| RPL21 (include 3 <sup>rd</sup><br>intron) | Forward | AGTTGTTCTTTGGCCACATA    |
|                                           | Reverse | TCAGGAAGCTATCTCGGCTC    |

**Table S2. mRNA splicing protein list based on Gene Ontology**

|     |         |          |         |          |          |         |         |         |           |         |
|-----|---------|----------|---------|----------|----------|---------|---------|---------|-----------|---------|
| 1   | KHDRBS2 | RBM17    | POLR2B  | MOQXG2   | RBM25    | DDX5    | DNAJC8  | BCAS2   | YJU2      | ISY1    |
| 11  | U2AF1L5 | CWF19L1  | NOL3    | TGS1     | FIP1L1   | CASC3   | TFIP11  | ZC3H10  | REST      | IK      |
| 21  | WDR83   | DHX9     | GPATCH1 | NCL      | SNRPC    | SPEN    | BUD13   | RBM3    | RBM10     | SRSF4   |
| 31  | DDX41   | USP4     | RBFOX1  | PQBP1    | RBM42    | RBM22   | PRPF19  | CDC40   | SYNCRIP   | LUC7L3  |
| 41  | GEMIN7  | WDR77    | POLR2E  | ZMAT2    | SRSF2    | DHX15   | PPIE    | NCBP2L  | HNRNPA2B1 | DHX16   |
| 51  | CLNS1A  | SNRNP200 | NUP98   | HTATSF1  | LUC7L2   | CPSF2   | RSRC1   | RBM41   | PNN       | PRMT7   |
| 61  | QKI     | U2SURP   | RBM14   | ESS2     | SNRNP40  | POLR2L  | RBM8A   | RBMXL1  | LSM8      | PTBP3   |
| 71  | PRPF3   | HNRNPR   | POLR2J  | POLR2H   | HNRNPUL1 | ZMAT5   | RBM15B  | STRAP   | PRPF4     | PPIL1   |
| 81  | PUF60   | PPWD1    | DCPS    | SRSF10   | DDX20    | PSIP1   | SYF2    | SLU7    | PTBP2     | ZBTB7A  |
| 91  | PCBP4   | CELF2    | DHX8    | LSM5     | RBM7     | DAZAP1  | MTREX   | PRPF40A | RBM5      | TRA2B   |
| 101 | LSM4    | NUDT21   | RBMX2   | WBP11    | THRAP3   | LSM2    | SNRNP35 | AAR2    | CD2BP2    | NCBP2   |
| 111 | MAGOHB  | SF3B6    | NSRP1   | RBMXL2   | WBP4     | SF3B1   | KHDRBS3 | PLRG1   | HNRNPM    | SRSF3   |
| 121 | LSM7    | POLR2G   | ZCRB1   | DDX1     | ALYREF   | HNRNPC  | CSTF3   | RBM4B   | SRPK3     | YTHDC1  |
| 131 | SNRPA   | SMN1     | SRSF7   | PPIL3    | RALY     | CPSF3   | SRRM4   | DDX23   | SF3B3     | SCAF11  |
| 141 | CELF1   | NOVA2    | ZCCHC8  | CTNBL1   | POLR2D   | SF3B2   | RBM24   | POLR2F  | C9orf78   | CCAR1   |
| 151 | DHX38   | RAVER2   | STH     | CWC22    | NOVA1    | METTL14 | U2AF2   | PRPF40B | EFTUD2    | SART3   |
| 161 | WTAP    | SNRPB2   | UBL5    | SNIP1    | CRNKL1   | PRPF39  | CELF4   | POLR2A  | DBR1      | DYRK1A  |
| 171 | SNRNP70 | METTL3   | PABPN1  | SF1      | K7EQG2   | SNRNP27 | M0R3G1  | TXNL4A  | HNRNPA3   | GCFC2   |
| 181 | CWC27   | SAP18    | SRRM2   | PRPF6    | SNRPN    | DDX46   | PTBP1   | RNPS1   | BUD31     | CSTF2T  |
| 191 | CELF3   | DDX39A   | DDX39B  | METTL16  | HNRNPL   | RBM23   | SNRPB   | TRA2A   | SRPK2     | PRPF4B  |
| 201 | M0R076  | SNRPA1   | HNRNPA1 | SNRPGP15 | FXR2     | FXR1    | SRRT    | I3L521  | MAGOH     | RNF113A |
| 211 | SF3A3   | SFSWAP   | GEMIN2  | SNUPN    | FRG1     | LUC7L   | POLR2C  | PRPF8   | POLR2K    | PHF5A   |
| 221 | HNRNPK  | SETX     | DDX17   | USP49    | C1QBP    | SNW1    | CPSF7   | PABPC1  | TXNL4B    | GEMIN8  |
| 231 | GEMIN5  | PDCD7    | KHDRBS1 | MBNL1    | RNPC3    | WDR33   | RBM11   | SRSF8   | MBNL3     | NCBP1   |
| 241 | PRMT5   | SRSF1    | CSTF2   | CPSF1    | HNRNPF   | CWF19L2 | SMU1    | RBM1B   | SFPQ      | SON     |
| 251 | HMX2    | PCF11    | UPF3B   | PRPF18   | SRSF11   | COIL    | TIA1    | CACTIN  | RBMX      | SF3A1   |
| 261 | FAM172A | SF3A2    | SF3B4   | RBM1F    | POLR2I   | RBM15   | RBM6    | RBMXL3  | LARP7     | HNRNPU  |
| 271 | RBM4    | SCNM1    | KHDC4   | SF3B5    | CELF5    | SRRM1   | NONO    | RAVER1  | PRCC      | JMJD6   |
| 281 | U2AF1L4 | GPKOW    | PCBP2   | PCBP1    | PSPC1    | SRSF12  | GEMIN6  | ELAVL1  | PAPOLA    | PRPF31  |
| 291 | DDX42   | SUGP1    | CHERP   | XAB2     | MFAP1    | PPIH    | EIF4A3  | CDC5L   | HNRNPH1   | HNRNPH3 |
| 301 | SYMPK   | CSTF1    | CLP1    | HSPA8    | ZRSR2    | ZRSR2P1 | USP39   | HNRNPD  | MYOD1     | FUS     |
| 311 | ELAVL2  | PRDX6    | GTF2F2  | HNRNPH2  | SNU13    | GTF2F1  | ESRP2   | CWC15   | SNRNP48   | KDM1A   |
| 321 | FMR1    | AQR      | DHX35   | SLC39A5  | SRSF6    | SRSF5   | SRSF9   | SART1   | SNRNP25   | SRPK1   |
| 331 | CWC25   | GEMIN4   | SNRPD3  | SNRPD2   | SNRPD1   | LSM6    | LSM3    | SNRPG   | SNRPF     | SNRPE   |
| 341 | CELF6   | RBM39    | PRPF38A | YBX1     | U2AF1    | MBNL2   | CPSF4   | SMNDC1  | RBM19     | RBFOX2  |
| 351 | HNRNPA0 | RBFOX3   | RBM1A1  | CIRBP    | CDK13    |         |         |         |           |         |

**Table S3. The genes regulated by NONO both in U251 and P3 cell lines**

| Gene Symbol   | Log2 transformed expression in GBM <sup>a</sup> | Log2 (fold change) | <i>P</i> value | Description                                                   |
|---------------|-------------------------------------------------|--------------------|----------------|---------------------------------------------------------------|
| GPX1          | 13.86                                           | -1.61              | 0.00           | Glutathione peroxidase 1                                      |
| CCN1          | 11.80                                           | -1.58              | 0.00           | Cysteine-rich, angiogenic inducer, 61                         |
| AK4           | 11.66                                           | -1.49              | 0.00           | Adenylate kinase 4                                            |
| NKTR          | 11.21                                           | -1.24              | 0.00           | Natural killer cell triggering receptor                       |
| GFPT2         | 10.97                                           | -1.54              | 0.00           | Glutamine-fructose-6-phosphate transaminase 2                 |
| LONRF2        | 10.55                                           | -2.24              | 0.00           | LON peptidase N-terminal domain and ring finger 2             |
| NPNT          | 10.33                                           | -1.50              | 0.00           | Nephronectin                                                  |
| KIT           | 8.60                                            | -1.00              | 0.02           | V-kit Hardy-Zuckerman 4 feline sarcoma viral oncogene homolog |
| DCHS2         | 7.00                                            | -1.14              | 0.01           | Dachsous cadherin-related 2                                   |
| STON1-GTF2A1L | 2.17                                            | -3.20              | 0.00           | General transcription factor IIA, 1-like                      |

a: Log2 transformed expression in GBM: The mean log2-transformed expression level in GBM based on TCGA database.

**Table S4. The splicing efficiency change of GPX1 and CCN1.**

| SYMBOL | NM_id       | Intron number | 5' or 3' splicing site | siNC spliced reads | siNONO spliced reads | siNC unspliced reads | siNONO unspliced reads | siNC splicing efficiency | siNONO splicing efficiency | FC <sup>a</sup> siNONO vs siNC | Regulation |
|--------|-------------|---------------|------------------------|--------------------|----------------------|----------------------|------------------------|--------------------------|----------------------------|--------------------------------|------------|
| GPX1   | NM_000581.4 | intron1       | 3ss                    | 2084               | 915                  | 17                   | 44                     | 122.59                   | 20.8                       | 0.17                           | down       |
| CCN1   | NM_001554.5 | intron3       | 3ss                    | 940                | 627                  | 13                   | 14                     | 72.31                    | 44.79                      | 0.62                           | down       |
| CCN1   | NM_001554.5 | intron3       | 5ss                    | 940                | 625                  | 10                   | 9                      | 94                       | 69.44                      | 0.74                           | down       |
| CCN1   | NM_001554.5 | intron4       | 3ss                    | 1102               | 820                  | 10                   | 15                     | 110.2                    | 54.67                      | 0.5                            | down       |

a: FC: Fold Change
